# Supplementary material for: Assessment of Glycometabolism Impairment and Glucose Variability Using Flash Glucose Monitoring System in Patients With Adrenal Diseases
Source: Front Endocrinol (Lausanne). 2020 Sep 25;11:544752. doi: 10.3389/fendo.2020.544752 (PMC7546367; doi:10.3389/fendo.2020.544752)
Supplement: Supplementary file 1 [file DataSheet_1.xls]

## Sheet: Sheet1
	remarks		gender	age	body mass index	estimated disease duration based on history taking	tumor size (cm)	estimated disease duration based on tumor size data (year)	maximal blood pressure (mmHg)	plasma potassium (mmol/L)	pathology report	adrenocorticotropin at 8am (pmol/L)	cortisol at 8am (nmol/L)	cortisol at 0am (nmol/L)	24-hour urine free cortisol (nmol/24h)	cortisol at 8am after overnight 1-mg dexamethasone suppression test (nmol/L)	cortisol at 8am after overnight 8-mg dexamethasone suppression test (nmol/L)	plasma renin activity upright (ng/ml/h)	plasma aldosterone upright (pg/ml)	plasma metanephrine (pg/ml)	urine metanephrine (ug/24h)	plasma epinephrine (pg/ml)	urine epinephrine (µg/day)	plasma norepinephrine (pg/ml)	urine norepinephrine (µg/day)	plasma dopamine (pg/ml)	urine dopamine (µg/day)
Cushing syndrome	1.The adrenocorticotropin level was unvailable in patient 3 of CS group.However, other data cited in the CS group inclusion criteria provided credible evidence for the CS diagnosis in this patient. 2.In PA group,the patients presented suppressed PRA and the calculated ARR conforms to the cut point for PA diagnosis, though the ALD levels did not significantly increase. At the same time, they prese…	1	female	46	22	4.5 years	2.6*2.8	9.3	150/110	2.84	adrenocortical adenoma	0.22	646.6	615	666.33	630.5	694.6	1.97	62.92	none	none	none	none	none	none	none	none
		2	female	60	25.4	7 years	2.1*3.7*2.4	12.3	170/100	2.6	adrenocortical adenoma	0.22	529	496	663.96	670	590.3	2.26	146.62	none	none	none	none	none	none	none	none
		3	male	49	18.1	4 years	1.5*2	6.7	150/105	3	adrenocortical adenoma	none	494.8	370.6	385.9	670	590.3	5.43	123.24	none	none	none	none	none	none	none	none
		4	male	56	25.7	6 years	2.9*2.9	9.7	185/95	3.43	adrenocortical adenoma	0.22	390.3	359.6	726.4	291.4	292.7	0.49	101.82	none	none	none	none	none	none	none	none
		5	male	25	20.7	2 years	2.4*3.0	10	160/100	3.2	adrenocortical adenoma	0.22	606.7	539	1563	668.3	685.8	5.72	144.98	none	none	none	none	none	none	none	none
primary aldosteronism		1	female	50	21.8	3 years	1.6*1.7	5.7	200/100	2.66	adrenocortical adenoma	1.68	297	37.9	none	none	none	0.03	104.38	none	none	none	none	none	none	none	none
		2	female	56	27.3	5 years	1.6*2.2	7.3	167/103	3.09	adrenocortical adenoma	1.97	133.4	50.6	none	none	none	0.01	178.76	none	none	none	none	none	none	none	none
		3	female	47	25.3	3 years	1.0*1.3	4.3	160/110	2.9	adrenocortical adenoma	4.07	191	36.5	none	none	none	0.01	76.68	none	none	none	none	none	none	none	none
		4	female	59	24.2	5 years	2.1*1.4	7	175/109	3.1	adrenocortical adenoma	3.44	381.1	242.1	none	none	none	0.01	121.43	none	none	none	none	none	none	none	none
		5	female	61	23.9	8 years	3.6*2.3	12	168/80	3.25	adrenocortical adenoma	1.14	387.3	81	none	none	none	0.01	266.85	none	none	none	none	none	none	none	none
		6	male	63	20.7	4 years	1.1*1.5	5	170/110	2.44	adrenocortical adenoma	10.23	379.7	69.5	none	none	none	0.02	169.6	none	none	none	none	none	none	none	none
		7	male	60	26.3	2 years	1.1*1.3	4.3	180/110	3.36	adrenocortical adenoma	3.55	498	81.3	none	none	none	0.01	87.77	none	none	none	none	none	none	none	none
		8	male	66	29.7	3 years	1.2*1	4	177/76	2.5	adrenocortical adenoma	5.44	207.9	45.2	none	none	none	0.01	164.92	none	none	none	none	none	none	none	none
		9	male	55	19.6	2.5 years	1.5*1.4	5	170/105	3.15	adrenocortical adenoma	6.48	367	115.9	none	none	none	0.01	230.62	none	none	none	none	none	none	none	none
pheochromacytoma		1	female	68	18.3	5 years	2.36*2.3	7.9	170/100	3.3	pheochromocytoma	5.26	544.9	101.7	none	none	none	1.98	257.64	none	none	39.29	9.45	196.79	31.84	58.38	19.44
		2	female	40	24.2	6 years	5.7*4.7	19	150/110	2.24	pheochromocytoma	8.19	284.4	206.1	none	none	none	0.92	174.55	none	none	49.2	25.27	582.4	95.12	45.37	15.92
		3	female	56	25.4	7 years	4.2*4.2	14	180/90	3.5	pheochromocytoma	2.89	194.4	232.1	none	none	none	5.67	89.34	none	none	57.43	7.24	234.67	46.32	53.24	16.32
		4	female	60	24.6	5 years	6.1*7.2	24	148/90	3.4	pheochromocytoma	5.81	318.7	54.2	none	none	none	5.25	90.28	217	417	none	none	none	none	none	none
		5	female	53	17.5	3 years	2.1*2.3	7.7	160/99	3.83	pheochromocytoma	3.97	550	102.7	none	none	none	4.95	173.92	none	none	63.25	36.82	367.92	73.23	36.78	13.54
		6	male	60	24.5	9 years	4.2*3.9	14	133/100	4.2	pheochromocytoma	10.37	494.7	188.5	none	none	none	5.45	210.83	none	none	42.26	4.16	601.53	85.28	57.67	11.08
		7	male	58	23.5	2 years	8.26*6.53	27.5	130/78	4.2	pheochromocytoma	8.11	751.5	89.9	none	none	none	6.03	119.44	none	none	92.47	8.79	169.45	84.44	78.01	103.61
		8	male	61	22	8 years	5.63*4.6	18.8	140/90	3	pheochromocytoma	5.49	286.6	149.5	none	none	none	6.15	137.65	none	none	34.17	5.75	195.59	83.55	88.24	234.47
		9	male	52	26.3	6.5 years	3.7*3	12.3	200/110	3.6	pheochromocytoma	4.92	461.3	90.9	none	none	none	4.91	90.14	191	1210	none	none	none	none	none	none
		10	male	57	23.7	7 years	4.5*4.5*4.4	15	190/130	3.29	pheochromocytoma	12.21	466	74.9	none	none	none	3.16	176.78	none	none	115.96	24.05	595.2	94.08	39.83	91.8
nonfunctional adrenal incidentaloma		1	female	49	27.3	ten days	1.9*2.3	7.7	120/80	4.03	adrenocortical adenoma	4.29	321.8	160.4	84.3	none	none	5.96	104.15	none	none	38.47	3.42	245.17	15.9	48.94	31.13
		2	female	55	28.9	fourteen days	3.7*2.6	12.3	120/75	3.6	adrenocortical adenoma	4.13	473.4	61.5	102.7	none	none	0.73	118.77	none	none	32.06	2.68	202.87	10.87	91.97	20.91
		3	female	33	27.9	three years	1.1*1.0	3.7	114/85	3.8	conservertive treatment	5.95	708	245.2	73.38	16.8	none	6.21	132.67	none	none	32.33	2.41	182.7	11.73	48.51	88.59
		4	female	37	24.1	three months	1*1.5	5	130/80	3.66	adrenocortical adenoma	9.12	489.6	179.7	179.85	none	none	1.09	134.34	none	none	35.37	4.15	140.5	27.83	40.24	121.39
		5	male	60	26.7	six months	1.5*1.2	5	143/110	3.66	adrenocortical adenoma	6.69	497.1	52	155.58	none	none	5.7	105	none	none	39.2	6.32	160.4	32.01	39.4	127.47
		6	male	49	27.2	one month	1.7*2.3	7.7	106/82	4.1	conservertive treatment	6.2	453.1	48.5	114.6	none	none	2.29	120.07	none	none	34.2	5.76	230.5	43.8	46.7	85.3
		7	male	57	21.1	ten days	2.0*1.5	6.7	137/97	3.5	conservertive treatment	2.01	283.3	58.7	103.54	none	none	5.36	206.33	none	none	43.8	4.23	178.4	36.2	49.4	65.4
		8	male	45	20.5	twenty days	3.3*3.1	11	122/74	4.17	adrenocortical adenoma	7.6	389.94	130.23	75.23	none	none	4.83	87	none	none	54.85	7.23	164.98	45.7	23.12	46.2
healthy controls		1	female	47	22.2	none	none	none	115/78	3.85	none	none	none	none	none	none	none	none	none	none	none	none	none	none	none	none	none
		2	female	53	22.9	none	none	none	106/80	3.92	none	none	none	none	none	none	none	none	none	none	none	none	none	none	none	none	none
		3	female	60	21.5	none	none	none	103/83	4.2	none	none	none	none	none	none	none	none	none	none	none	none	none	none	none	none	none
		4	female	62	19.1	none	none	none	115/83	3.96	none	none	none	none	none	none	none	none	none	none	none	none	none	none	none	none	none
		5	male	49	23.6	none	none	none	108/76	4.24	none	none	none	none	none	none	none	none	none	none	none	none	none	none	none	none	none
		6	male	57	24.2	none	none	none	110/85	4.1	none	none	none	none	none	none	none	none	none	none	none	none	none	none	none	none	none
		7	male	71	23.8	none	none	none	106/83	4.01	none	none	none	none	none	none	none	none	none	none	none	none	none	none	none	none	none
		8	male	43	22.1	none	none	none	108/80	3.9	none	none	none	none	none	none	none	none	none	none	none	none	none	none	none	none	none
								7.3875
								2.9964
